# Supplementary material
Source: PubMed Central journal article supplement (PMC10992096)
Supplement: 262_2021_2894_MOESM1_ESM.pdf [file 262_2021_2894_MOESM1_ESM.pdf]

**Table S2 Genotypes and allele frequencies of the SNPs polymorphisms in LARC**

|                               | No. | Genotypes frequencies (%) | Allele frequency (%) |
|-------------------------------|-----|---------------------------|----------------------|
| TIM3 rs1036199 (c. 4259 G>T)  | 130 |                           |                      |
| GG                            | 19  | 14.62                     |                      |
| GT                            | 2   | 1.54                      |                      |
| TT                            | 109 | 83.85                     |                      |
| G:T                           |     |                           | 0.154:0.846          |
| P2RX7 rs3751143 (c. 1513 A>C) | 130 |                           |                      |
| AA                            | 90  | 69.23                     |                      |
| AC                            | 34  | 26.15                     |                      |
| CC                            | 6   | 4.62                      |                      |
| A:C                           |     |                           | 0.823:0.177          |
| TLR1 rs5743618 (c. 1805 G>T)  | 130 |                           |                      |
| GG                            | 20  | 15.38                     |                      |
| TG                            | 3   | 2.31                      |                      |
| TT                            | 107 | 82.31                     |                      |
| G:T                           |     |                           | 0.165:0.835          |
| FPR1 rs867228 (c. 1037 A>C)   | 128 |                           |                      |
| AA                            | 10  | 7.69                      |                      |
| AC                            | 45  | 34.62                     |                      |
| CC                            | 73  | 56.15                     |                      |
| A:C                           |     |                           | 0.254:0.746          |
