# Supplementary material
Source: PubMed Central journal article supplement (PMC10992096)
Supplement: 262_2021_2894_MOESM2_ESM.pdf [file 262_2021_2894_MOESM2_ESM.pdf]

**Table S1. Polymorphisms evaluated in this study.**

| rs number | Nucleotide allele | Variation | Forward primer |                                                                  | Sequencing primer      |
|-----------|-------------------|-----------|----------------|------------------------------------------------------------------|------------------------|
|           |                   |           | Forward primer | Reverse primer                                                   |                        |
| TIM3      | rs1036199         | G/T       | R140L          | ACGTTGGATGCTGACATTAGCCAAGGTCAC<br>ACGTTGGATGCCTGGTGGTAAGCATCCTTG | CCCCTGCACCGACTC        |
| P2RX7     | rs3751143         | A/C       | E496A          | ACGTTGGATGAACAGCTCTGAGGTGGTGAT<br>ACGTTGGATGATCTCAACTCCCTGAGAGCC | cggaTTTTTCCGGCAGCACAGC |
| TLR1      | rs5743618         | G/T       | S602I          | ACGTTGGATGTGAGATACCAGGGCAGATCC<br>ACGTTGGATGGCTGATCGTCACCATCGTTG | GGGCAGATCCAAGTAG       |
| FPR1      | rs867228          | A/C       | E346A          | ACGTTGGATGCTGGGAGCTCGAAAGTGTC<br>ACGTTGGATGAGTGACACAGCTACCAATTC  | CTCACTTGCCTGTAAC       |
